# Supplementary material
Source: PubMed Central journal article supplement (PMC5075971)
Supplement: supp_WNL.0000000000003177_Table_e-1.pdf [file supp_WNL.0000000000003177_Table_e-1.pdf]

**Table e-1. Genotype of Parkinson's disease patients with Parkin mutations and associated ICB and smoking status**

| Patient | Gender | ICB (Y/N) | Smoking (Y/N) | <i>Parkin</i> genotype       |
|---------|--------|-----------|---------------|------------------------------|
| 1       | M      | N         | N             | c.823C>T (p.R275W)/ex3-4del  |
| 2       | M      | N         | N             | ex3-4del/ex3del              |
| 3       | F      | N         | N             | c.125G>C (p.R42P) homo       |
| 4       | M      | N         | N             | ex3-4del omo                 |
| 5       | M      | N         | N             | c.1358G>A(p.W453X )/ex3del   |
| 6       | M      | N         | Y             | c.125G>C (p.R42P) homo       |
| 7       | M      | N         | Y             | c.823C>T (p.R275W)/ex3dup    |
| 8       | F      | Y         | N             | ex3del homo                  |
| 9       | F      | Y         | N             | ex3del homo                  |
| 10      | F      | Y         | N             | ex3-5del/ex3del              |
| 11      | M      | Y         | N             | c.259G>A (p.D86N)/ex3del     |
| 12      | M      | Y         | N             | ex2-3del/ex2del              |
| 13      | M      | Y         | N             | c.719C>T (p.T240M )/ex2-4del |
| 14      | F      | Y         | N             | ex3del homo                  |
| 15      | M      | Y         | N             | ex3del homo                  |
| 16      | F      | Y         | Y             | c.125G>C (p.R42P)/ex3del     |
| 17      | M      | Y         | Y             | ex3del homo                  |
| 18      | F      | Y         | Y             | c.125G>C (p.R42P) homo       |
| 19      | M      | Y         | Y             | ex2del homo                  |
| 20      | M      | Y         | Y             | ex3del homo                  |
| 21      | F      | Y         | Y             | c.734G>A (p.R245K) homo      |
| 22      | F      | Y         | Y             | c.734G>A (p.R245K) homo      |

ICB = impulsive-compulsive behaviour; Y = yes; N = No.
